# Supplementary material for: Synthesis, size and magnetic properties of controllable MnFe2O4 nanoparticles with versatile surface functionalities
Source: Royal Society of Chemistry journal article supplement (doi:10.1039/c4dt00089g), 2014-01-01
Supplement: c4dt00089g1.pdf [file c4dt00089g1.pdf]

## Electronic Supplementary Information (ESI)

### 1. Magnetic hysteresis curves of the $\text{MnFe}_2\text{O}_4$ NPs with different reaction temperature

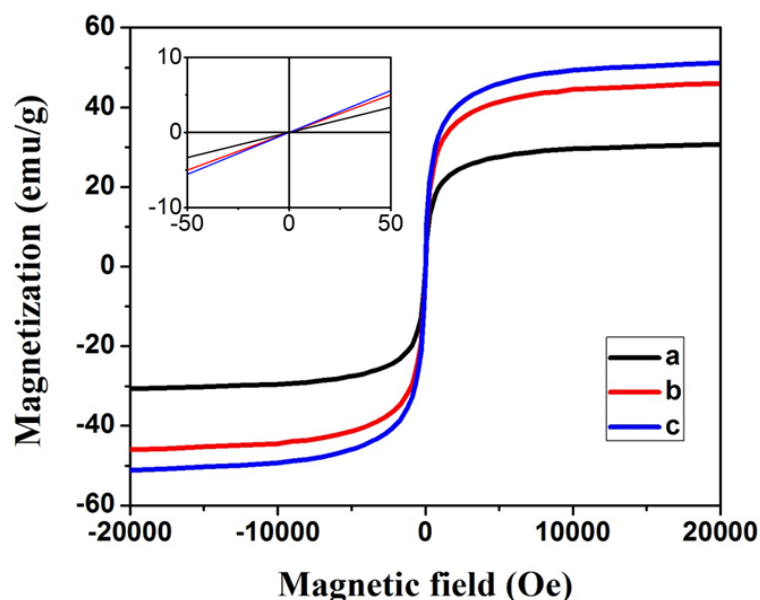

**Figure S1** Magnetic hysteresis curves of the  $\text{MnFe}_2\text{O}_4$  NPs at 300 K with different reaction temperature (a) 140 °C (b) 160 °C (c) 180 °C

Figure S1. shows the magnetization hysteresis curves of the synthesized  $\text{MnFe}_2\text{O}_4$  NPs at 300 K and with the magnetic field of 20 kOe. We can draw from Figure S1 that  $\text{MnFe}_2\text{O}_4$  NPs prepared at 140 °C, 160 °C and 180 °C have superparamagnetic properties for their remanence and coercivity are zero. And their saturation magnetization is 30.67, 46.01 and 51.12  $\text{emu}\cdot\text{g}^{-1}$ , respectively. With the increasing of reaction temperature, NPs become larger, which makes the saturation magnetization increasing simultaneously.

### 2. X-ray diffraction of $\text{MFe}_2\text{O}_4$ NPs
